# Supplementary material
Source: Royal Society of Chemistry journal article supplement (doi:10.1039/d6an00170j)
Supplement: d6an00170j1.pdf [file d6an00170j1.pdf]

1  
2  
3  
4  
5  
6  
7  
8  
9  
10  
11  
12  
13  
14  
15  
16  
17

## Supplementary information

### **Cyclic cataluminescence method enabled by heterogeneous electron allocator for multiple aldehydes detection in tea**

Huiting Chen<sup>#</sup>, Mengmeng Ji<sup>#</sup>, Ling Xia, Yufei Hu\*, Gongke Li\*

School of Chemistry, Sun Yat-sen University, Guangzhou 510006, China

\*Corresponding authors:

cesgkl@mail.sysu.edu.cn (Gongke Li)

huyufei@mail.sysu.edu.cn (Yufei Hu)

<sup>#</sup> Huiting Chen and Mengmeng Ji contributed equally.

## 18 **Materials and chemical reagents**

19 Acetaldehyde, 2-methylbutyral, pentanal, n-heptanaldehyde, ethanol,  
20 acetophenone, acetic acid, benzaldehyde, linalool, geranyl, cyclohexanol, methyl  
21 benzoate, ethyl benzoate, 2-heptanone, nitric acid, gadolinium nitrate hexahydrate, urea  
22 and MgO were purchased from Aladdin Reagent Co., LTD. (Shanghai, China). All  
23 reagents were analytically pure and used directly without further purification. Carbon  
24 nanotubes were prepared by Time Nano (outer diameter greater than 50 nm, length:  
25 0.5-2  $\mu\text{m}$ , purity greater than 98%). Deionized water was used in all experiments.

## 26 **Instruments**

27 The Biological & Physical Chemiluminescence (BPCL) weak chemiluminescence  
28 instrument was acquired from the Institute of Biophysics, Chinese Academy of  
29 Sciences (Beijing, China). The voltage controller was obtained from Xiechang Voltage  
30 Equipment Manufacturing Co., Ltd., Shanghai, China. The peristaltic pump  
31 (FAT200.8) was sourced from Xinweicheng Technology Co., Ltd. (Chengdu, China).  
32 The electromagnetic valve was procured from Valco Instrument Co., Ltd. (The United  
33 States). The ceramic heater core was purchased from Huiyou Electronics Co., Ltd.  
34 (Zhuhai, China). Gas chromatography-mass spectrometry (GC-MS) was purchased  
35 from Agilent Technologies. The morphology, and constituents of the catalysts were  
36 analyzed using scanning electron microscopy (SEM), D8 ADVANCE X-ray powder  
37 diffractometer (XRD, Bruker, Germany) characterized the crystal structure of the  
38 materials, X-ray photoelectron spectroscopy (XPS, K-Alpha+), thermogravimetric  
39 analyzer (TG 209 F3 Tarsus), and surface area and porosity analyzer (Micromeritics  
40 ASAP 2020M), respectively.

## 41 **Gas chromatography-mass spectrometry program**

42 The concentrations of acetaldehyde, pentanal and 2-methylbutyral in tea were  
43 determined by GC-MS. Column: DB-WAXeter quartz capillary column (60 m  $\times$  0.25  
44 mm, inner diameter 0.25  $\mu\text{m}$ , film thickness 0.25  $\mu\text{m}$ ). Carrier gas was nitrogen. Inlet  
45 temperature was 280°C, heating conditions was at the initial temperature of 130°C, keep

46 for 1 min and rise to 280°C at 10 °C/min for 3 min. Ion source temperature was 230°C.  
47 Quadrupole temperature was 150°C. Column flow rate was 1.00 mL/min.

#### 48 **Construction and operation of CCTL system**

49 The cyclic cataluminescence (CCTL) system included a self-made reaction  
50 chamber, a voltage controller, a BPCL ultra-weak luminescence analyzer with a  
51 photomultiplier tube as the detector, a peristaltic pump, a three-way valve, and a  
52 miniature electric six-way solenoid valve. The reaction chamber was a self-made quartz  
53 tube, in which a ceramic heating rod coated with solid catalyst was placed.  
54 Polytetrafluoroethylene (PTFE) hoses were used to connect pump and valve  
55 components. The three-way valve was directly connected to port of the six-way  
56 solenoid valve, and the two inlet ports of the reaction chamber were connected to ports  
57 of the microelectric six-way solenoid valve, forming a circuit. By changing the working  
58 state of the solenoid valve, the direction of the current carrying capacity could be  
59 automatically changed within a specified period. Therefore, when the sample was  
60 injected into the CCTL system, chemicals of different cycles can repeatedly pass  
61 through the reaction pool, resulting in a series of chemiluminescence signals that  
62 conform to the exponential decay equation.

#### 63 **CCTL measurement procedure**

64 After stabilization of the instrument, the analytical sample is injected into the  
65 three-way valve through the gas injection needle. After mixing the air, analytical  
66 sample flows through the quartz tube and is oxidized by oxygen in the air on the catalyst  
67 surface. During the test, the circuit is changed by altering the working state of the  
68 solenoid valve, so that the reaction substances of different periods flow through the  
69 reaction pool and produce a series of chemiluminescence signals. The luminescence  
70 signal is directly measured by BPCL ultra-weak chemiluminescence analyzer.

#### 71 **Computational details**

72 All calculations were performed using the first-principles tool, Vienna Ab initio  
73 Simulation Package (VASP). All density functional theory (DFT) calculations were



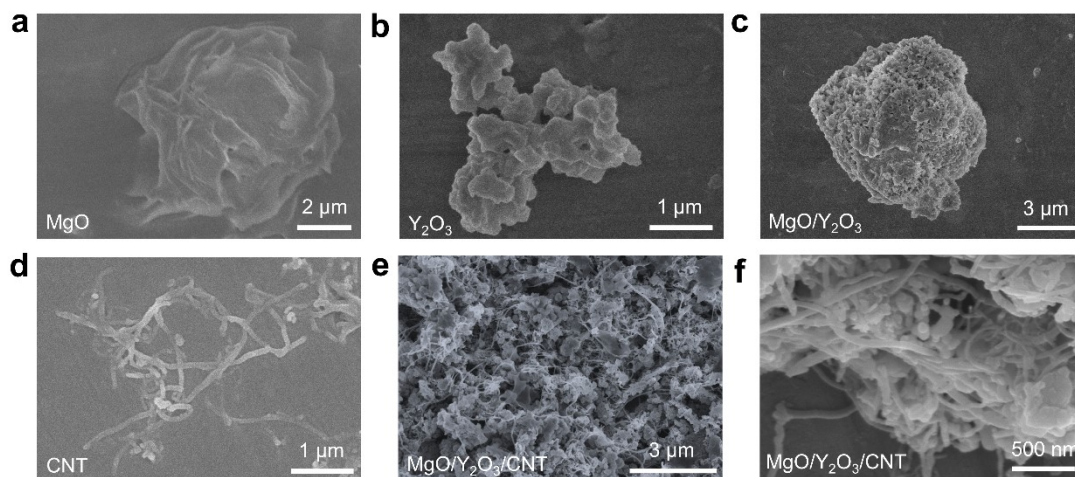

91

92 **Fig. S2** SEM characterization (a) MgO, (b) Y<sub>2</sub>O<sub>3</sub>, (c) MgO/Y<sub>2</sub>O<sub>3</sub>, (d) CNT, and (e)

93

MgO/Y<sub>2</sub>O<sub>3</sub>/CNT.

94

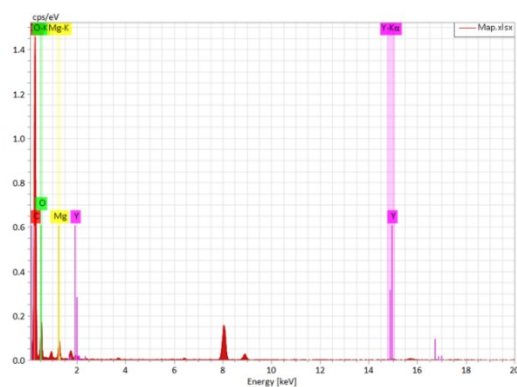

95

96

**Fig. S3** EDS of MgO/Y<sub>2</sub>O<sub>3</sub>/CNT catalyst.

97

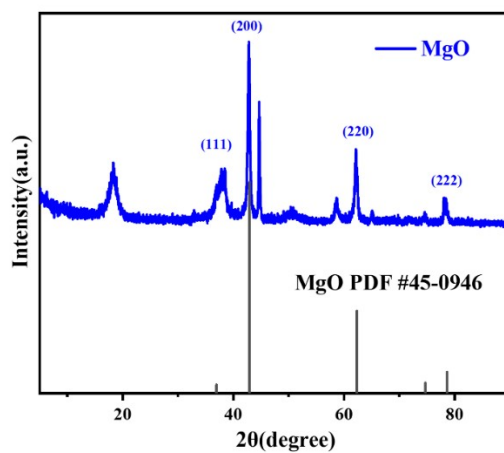

98

99

**Fig. S4** XRD pattern of MgO.

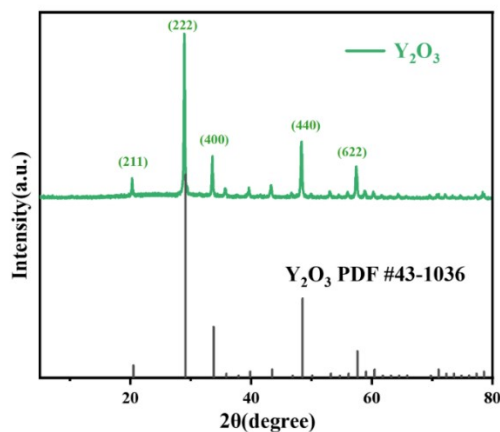

Fig. S5 XRD pattern of  $Y_2O_3$ .

Table S1 Estimation of crystallite size of MgO and  $Y_2O_3$  using XRD data.

| Parameter       | MgO  | $Y_2O_3$ |
|-----------------|------|----------|
| $2\theta$ (deg) | 42.9 | 29.1     |
| FWHM (deg)      | 0.3  | 0.4      |
| D(nm)           | 26   | 21       |

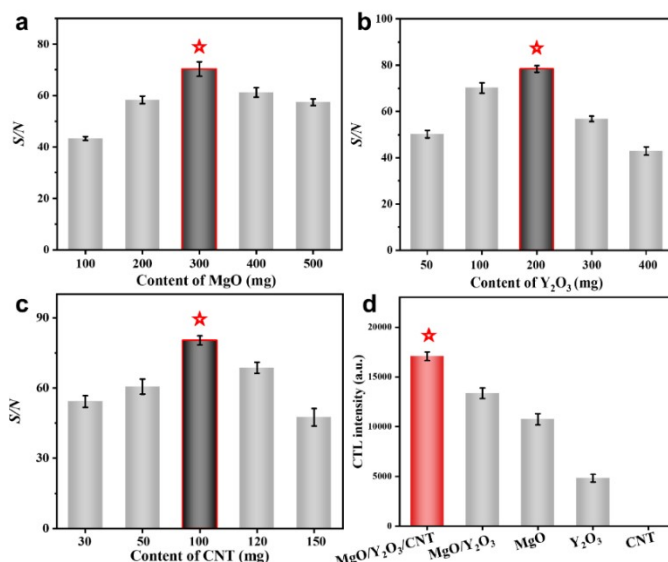

Fig. S6 Optimization of MgO/ $Y_2O_3$ /CNT catalyst (a) MgO addition (b)  $Y_2O_3$  addition (c) CNT addition. (d) CCTL intensity of acetaldehyde on different catalysts.

(Concentration: 8.0 mg/L; rotational speed: 35 rpm; detection wavelength: 440 nm;

temperature: 210°C)

110

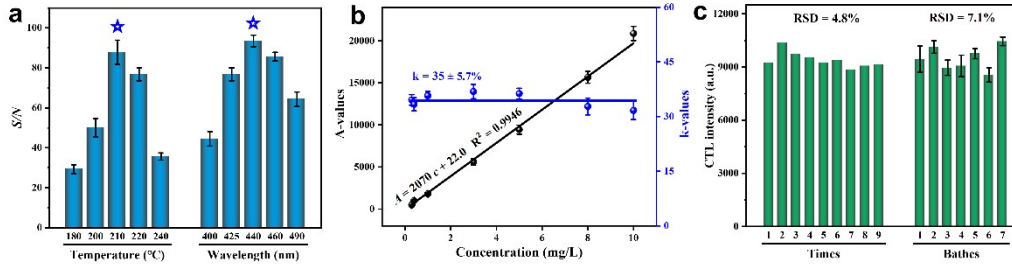

111

112 **Fig. S7** Study on influencing factors of CCTL (a) temperature, detection wavelength  
113 and (b) acetaldehyde concentration. (c) CTL intensity of acetaldehyde applied for 9  
114 consecutive times on MgO/Y<sub>2</sub>O<sub>3</sub>/CNT surface and CTL intensity of acetaldehyde on  
115 the surface of 7 batches MgO/Y<sub>2</sub>O<sub>3</sub>/CNT. (Concentration: 5.0 mg/L; rotational speed:  
116 35 rpm; detection wavelength: 440 nm; temperature: 210°C)

117

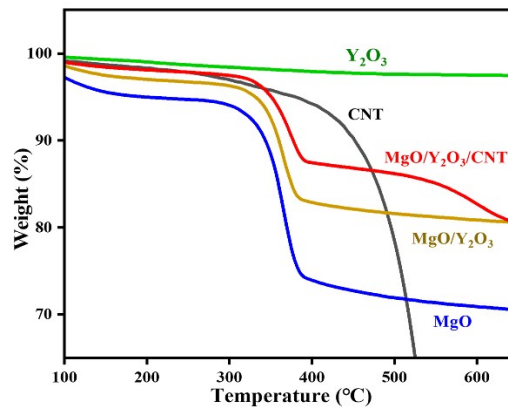

118

119

**Fig. S8** Catalysts characterization of thermogravimetric curve.

120

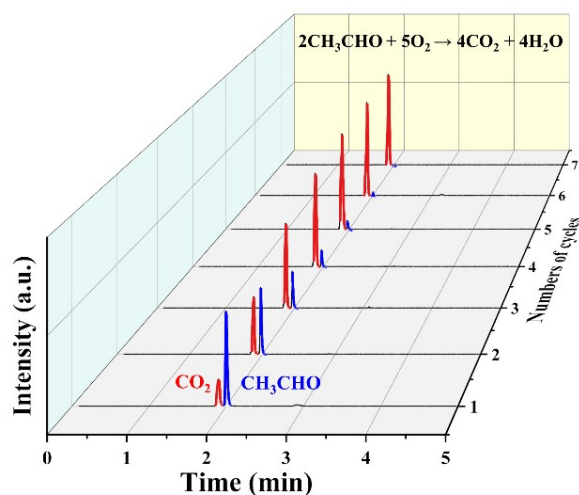

121

122 **Fig. S9** GC-MS chromatogram of catalytic oxidation of acetaldehyde.

123

### Acetaldehyde on the CNT (002)

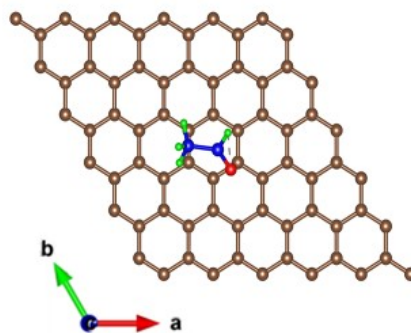

$$E_a = -4.24 \text{ kcal/mol}$$

124

125 **Fig. S10** Adsorption capacity of CNT (002) for acetaldehyde.

126

127 **Table S2.** The measured and theoretical values of binary components  $A$  and  $k^a$

| pentanal<br>(w, %) | acetaldehyde<br>(w, %) | $A_m$ | $A_t$ | Relative<br>error (%) | $k_m$ | $k_t$ | Relative<br>error (%) |
|--------------------|------------------------|-------|-------|-----------------------|-------|-------|-----------------------|
| 0                  | 100                    | 18025 | 18025 | 0                     | 38.1  | 38.1  | 0                     |
| 20                 | 80                     | 17402 | 16324 | 6.6                   | 30.5  | 34.0  | -10.3                 |
| 50                 | 50                     | 15357 | 13773 | 11.5                  | 25.4  | 27.8  | -8.6                  |
| 80                 | 20                     | 9426  | 11221 | -16.0                 | 23.6  | 21.5  | 9.8                   |
| 100                | 0                      | 9521  | 9521  | 0                     | 17.4  | 17.4  | 0                     |

128 (a.  $k_m$  and  $A_m$ : measured values,  $k_t$  and  $A_t$ : theoretical values)

129

130 **Table S3.** The measured and theoretical values of ternary components  $A$  and  $k$

| pentanal<br>(w, %) | acetaldehyde<br>(w, %) | 2-methylbutyraldehyde<br>(w, %) | $A_m$ | $A_t$ | Relative<br>error (%) | $k_m$ | $k_t$ | Relative<br>error (%) |
|--------------------|------------------------|---------------------------------|-------|-------|-----------------------|-------|-------|-----------------------|
| 33                 | 33                     | 33                              | 12510 | 11017 | 13.6                  | 20.8  | 19.7  | 5.6                   |
| 25                 | 25                     | 50                              | 8375  | 9807  | -14.6                 | 17.3  | 15.9  | 8.8                   |
| 0                  | 0                      | 100                             | 5840  | 5840  | 0                     | 4.1   | 4.1   | 0                     |
| 25                 | 50                     | 25                              | 14100 | 12853 | 9.7                   | 22.7  | 24.4  | -7.0                  |
| 0                  | 100                    | 0                               | 18025 | 18025 | 0                     | 38.1  | 38.1  | 0                     |
| 50                 | 25                     | 25                              | 8862  | 10727 | -17.4                 | 21.5  | 19.3  | 11.4                  |
| 100                | 0                      | 0                               | 9521  | 9521  | 0                     | 17.4  | 17.4  | 0                     |

131

132 **Table S4.** Comparison of the CCTL method with other methods for identifying tea  
133 origin.

| Method | Sample<br>pretreatment | Equipment<br>cost | Detection<br>time | Sensitivity     | Accuracy | Ref.      |
|--------|------------------------|-------------------|-------------------|-----------------|----------|-----------|
| GC-MS  | Complexity             | Expensive         | 20-30 min         | $\mu\text{g/L}$ | 90%      | [1]       |
| NIRS   | Simple                 | Expensive         | 5 min             | -               | 99%      | [2]       |
| HSI    | Simple                 | Expensive         | 5 min             | -               | 100%     | [3]       |
| E-nose | Simple                 | Inexpensive       | 2-5 min           | $\mu\text{g/L}$ | 100%     | [4]       |
| CCTL   | Simple                 | Inexpensive       | 2-5 min           | $\text{mg/L}$   | 100%     | This work |

134 [1] S. Luo, Y. Shen, W. Cheng, N. Wang, Y. Zhang, J. Wang, D. Chang, J. Li, X. Guo,

135 H. Gao, Food Chem. 2026, 512, 148901

136 [2] H. Xia, W. Chen, D. Hu, A. Miao, X. Qiao, G. Qiu, J. Liang, W. Guo, C. Ma, Food  
137 Chem. 2024, 440, 138242.

138 [3] X. Ge, J. Sun, B. Lu, Q. Chen, W. Xun, Y. Jin, J. Food Process Eng. 2019, 42,  
139 e13289.

140 [4] F. Li, X. Wang, S. Zhou, D. Wang, Z. Gong, M. Fan, ACS Food Sci. Technol. 2022,  
141 2, 1096-1102.

142

143

144

145
